# Supplementary material
Source: PubMed Central journal article supplement (PMC2757785)
Supplement: NIHMS100810-supplement-1.pdf [file NIHMS100810-supplement-1.pdf]

**Supplement to Table 3.** Summary of *F* Ratios (and  $\epsilon$  Corrections) from Repeated Measures ANOVA Performed on Stimulus-locked CSD-PCA Factors at Selected Sites.

| Variable  | Auditory Factor (Sites) |                               |                        |           |                                                  |                  |                                             |  |
|-----------|-------------------------|-------------------------------|------------------------|-----------|--------------------------------------------------|------------------|---------------------------------------------|--|
|           | 110                     |                               | 210                    |           | 385                                              |                  | 685                                         |  |
|           | N1 sink<br>(C3/4)       | P2 source<br>(FC5/6,<br>C3/4) | N2 sink<br>(Cz) (C3/4) |           | P3 source<br>(P3/4, P7/8,<br>CP5/6) <sup>a</sup> |                  | (FC5/6, F7/8,<br>FT9/10, T7/8) <sup>b</sup> |  |
| G         |                         |                               | 9.79 **                | 27.0 **** | 19.5 ****                                        | 6.25 *           |                                             |  |
| C         |                         |                               |                        | 4.62 *    | 26.7 ****                                        | 42.0 ****        |                                             |  |
| C × G     |                         |                               |                        |           | 13.2 ***                                         |                  |                                             |  |
| H         |                         | 10.4 **                       | -                      | 11.6 **   | 10.3 **                                          |                  |                                             |  |
| H × G     |                         |                               | -                      | 3.72      |                                                  |                  |                                             |  |
| H × C × G |                         |                               | -                      | 3.13      |                                                  | 5.41 *           |                                             |  |
| S         | -                       | 5.04 *                        | -                      | -         | 26.6 **** (0.81)                                 | 2.70 (0.70)      |                                             |  |
| S × G     | -                       | -                             | -                      | -         |                                                  | 4.29 * (0.70)    |                                             |  |
| S × C     | -                       | -                             | -                      | -         | 8.19 *** (0.83)                                  | 3.61 * (0.82)    |                                             |  |
| S × H     | -                       | 12.2 ***                      | -                      | -         |                                                  | 15.9 **** (0.71) |                                             |  |
| S × C × G | -                       |                               | -                      | -         |                                                  | 3.75 * (0.82)    |                                             |  |
| S × H × G | -                       | 3.05                          | -                      | -         |                                                  |                  |                                             |  |
| S × C × H | -                       |                               | -                      | -         | 12.7 **** (0.84)                                 |                  |                                             |  |

  

| Variable  | Visual Factor (Sites)                            |                     |                                                    |         |                                                    |           |          |  |
|-----------|--------------------------------------------------|---------------------|----------------------------------------------------|---------|----------------------------------------------------|-----------|----------|--|
|           | 130                                              |                     | 195                                                |         | 270                                                |           | 490      |  |
|           | N1 sink<br>(P7/8, P9/10,<br>O1/2) <sup>(a)</sup> | P2 source<br>(O1/2) | N2 sink<br>(TP9/10, P9/10,<br>P7/8) <sup>(a)</sup> |         | P3 source<br>(P3/4, P7/8,<br>CP5/6) <sup>(a)</sup> |           | (Cz, Pz) |  |
| G         |                                                  |                     |                                                    | 6.94 ** | 11.0 **                                            | 3.17      |          |  |
| C         |                                                  |                     |                                                    | 6.81 ** |                                                    | 27.9 **** |          |  |
| C × G     |                                                  |                     |                                                    |         | 5.22 *                                             |           |          |  |
| H         | 4.90 *                                           | 9.47 **             |                                                    | -       | 12.7 **                                            | -         |          |  |
| H × G     |                                                  |                     |                                                    | -       | 3.49                                               | -         |          |  |
| H × C × G |                                                  |                     |                                                    | -       |                                                    | -         |          |  |
| S         |                                                  | -                   |                                                    | -       | 17.0 **** (0.70)                                   | 20.0 **** |          |  |
| S × G     |                                                  | -                   |                                                    | -       |                                                    |           |          |  |
| S × C     | 3.04 (0.63)                                      | -                   |                                                    | -       | 8.82 *** (0.97)                                    |           |          |  |
| S × H     |                                                  | -                   | 4.01 * (0.63)                                      | -       |                                                    |           |          |  |
| S × C × G |                                                  | -                   | -                                                  | -       |                                                    |           |          |  |
| S × H × G |                                                  | -                   | -                                                  | -       | 2.45 (0.92)                                        | -         |          |  |
| S × C × H | 3.08 (0.80)                                      | -                   | -                                                  | -       |                                                    | -         |          |  |

Note. G = Group (patients, controls); C = condition (new, old); H = hemisphere (left, right); S = electrode site (subsets as indicated). Only *F* ratios with  $p < .10$  are reported. For  $\epsilon$ -corrected effects,  $df = 2, 76^{(a)}$  or  $df = 3, 114^{(b)}$ ; for all other effects,  $df = 1, 38$ .

- Effect not applicable.

\*  $p \leq .05$ . \*\*  $p \leq .01$ . \*\*\*  $p \leq .001$ , \*\*\*\*  $p \leq .0001$ .

**Supplement to Table 4.** Summary of *F* Ratios (and  $\epsilon$  Corrections) from Repeated Measures ANOVA Performed on Response-locked CSD-PCA Factors at Selected Sites.

| Variable      | Auditory Factor (Sites)          |                                          |           |               |            |              |  |
|---------------|----------------------------------|------------------------------------------|-----------|---------------|------------|--------------|--|
|               | <b>-150</b>                      |                                          | <b>45</b> |               | <b>205</b> |              |  |
|               | P3 source                        |                                          | FRN       |               | LN sink    |              |  |
|               | (P3/4, P7/8, CP5/6) <sup>a</sup> | (FC5/6, F7/8, FT9/10, T7/8) <sup>b</sup> | (Fz)      | (CP5/6, P3/4) | (O1/2)     | (C3/4, T7/8) |  |
| G             | 4.34 *                           |                                          | 9.16 **   | 14.3 ***      |            |              |  |
| C             | 38.8 ****                        | 16.1 ***                                 | 3.58      |               | 3.72       | 21.2 ****    |  |
| C × G         | 3.22                             | 6.84 **                                  | 7.26 **   |               |            |              |  |
| H             | 3.04                             |                                          | -         |               |            |              |  |
| H × G         | 3.11                             |                                          | -         |               |            |              |  |
| H × C         |                                  | 2.85                                     | -         |               |            | 7.05 **      |  |
| H × C × G     | 3.41                             |                                          | -         |               | 5.37 *     |              |  |
| S             | 19.3 **** (0.84)                 | 3.79 * (0.70)                            | -         |               | -          |              |  |
| S × G         | 7.34 ** (0.84)                   | 8.68 *** (0.70)                          | -         |               | -          |              |  |
| S × C         | 4.32 * (0.93)                    |                                          | -         |               | -          | 15.3 ***     |  |
| S × H         |                                  | 12.5 **** (0.72)                         | -         | 9.64 **       | -          | 12.1 ***     |  |
| S × C × H     | 4.55 * (0.81)                    |                                          | -         |               | -          | 6.85 **      |  |
| S × C × H × G | 4.59 * (0.81)                    |                                          | -         |               | -          |              |  |

  

| Variable  | <b>B</b>                         |          |           |               |            |              |           |
|-----------|----------------------------------|----------|-----------|---------------|------------|--------------|-----------|
|           | <b>-135</b>                      |          | <b>40</b> |               | <b>175</b> |              |           |
|           | P3 source                        |          | FRN       |               | LN sink    |              |           |
|           | (P3/4, P7/8, CP5/6) <sup>a</sup> | (Cz, Pz) | (Fz)      | (CP5/6, P3/4) | (O1/2)     | (C3/4, T7/8) | (Cz, Pz)  |
| G         | 10.0 **                          |          |           | 6.62 **       | 10.8 **    | 5.97 *       | 13.4 ***  |
| C         | 4.70 *                           | 12.6 *** | 6.50 **   | 10.4 **       |            |              | 46.0 **** |
| C × G     | 2.95                             |          |           |               |            |              | 11.6 **   |
| H         | 15.4 ***                         | -        | -         |               |            |              |           |
| H × C     |                                  | -        | -         |               | 5.44 *     | 5.82 *       |           |
| S         | 13.3 **** (0.80)                 | 14.8 *** | -         |               | -          | 3.69         | 21.8 **** |
| S × G     |                                  |          | -         |               | -          |              | 12.0 ***  |
| S × C     |                                  | 6.55 **  | -         |               | -          | 3.44         |           |
| S × H     |                                  | -        | -         | 3.10          | -          |              |           |
| S × C × G |                                  |          | -         |               | -          | 3.50         |           |

Note. G = Group (patients, controls); C = condition (new, old); H = hemisphere (left, right); S = electrode site (subsets as indicated). Only *F* ratios with  $p < .10$  are reported. For  $\epsilon$ -corrected effects,  $df = 2, 76$ <sup>(a)</sup> or  $df = 3, 114$ <sup>(b)</sup>; for all other effects,  $df = 1, 38$ .

- Effect not applicable.

\*  $p \leq .05$ . \*\*  $p \leq .01$ . \*\*\*  $p \leq .001$ , \*\*\*\*  $p \leq .0001$ .
